# Supplementary material for: Bacterial Diversity and Interaction Networks of Agave lechuguilla Rhizosphere Differ Significantly From Bulk Soil in the Oligotrophic Basin of Cuatro Cienegas
Source: Front Plant Sci. 2020 Jul 16;11:1028. doi: 10.3389/fpls.2020.01028 (PMC7378863; doi:10.3389/fpls.2020.01028)
Supplement: Supplementary file 1 [file DataSheet_1.xlsx]

## Sheet: Hoja1
Phyla	Genera bootsrap>80%	phototroph	chemoorganotroph	chemolithotroph	Motility	filamentous	Exopolysacharides	copiothroph	oligotrophph	Formation of endospores	Formation of exospores	Formation of spores	Formation of cysts	Formation of akinetes	Tolerance to desiccation	Tolerance to salts	Tolerance to Temperature	C mineralization	C fixation	Nitrogen Fixation	Ammonia Oxidation	Nitrate Reduction	Denitrification	Formation of PHA inclusions or PP	P solubilizers	siderophores	antibiosis	Reference
Acidobacteria	Acidobacteria 11B-2 UU	0	1	0	0	0	1	0	1	0	0	0	0	0	0	0	0	1	0	0	0	0	0	0	0	1	0	Kielak, A. M., Barreto, C. C., Kowalchuk, G. A., van Veen, J. A., & Kuramae, E. E. (2016). The ecology of Acidobacteria: moving beyond genes and genomes. Frontiers in microbiology, 7.
Acidobacteria	Bryobacter	0	1	0	0	0	0	0	1	0	0	0	0	0	0	0	0	1	0	0	0	0	0	0	0	1	0	Kulichevskaya, I. S., Suzina, N. E., Liesack, W., & Dedysh, S. N. (2010). Bryobacter aggregatus gen. nov., sp. nov., a peat-inhabiting, aerobic chemo-organotroph from subdivision 3 of the Acidobacteria. International journal of systematic and evolutionary microbiology, 60(2), 301-306.
Acidobacteria	Acidobacteria S4 RB41 U	0	1	0	0	0	1	0	1	0	0	0	0	0	0	0	0	1	0	0	0	0	0	0	0	1	0	Kielak, A. M., Barreto, C. C., Kowalchuk, G. A., van Veen, J. A., & Kuramae, E. E. (2016). The ecology of Acidobacteria: moving beyond genes and genomes. Frontiers in microbiology, 7.
Acidobacteria	Blastocatella	0	1	0	1	0	0	0	1	0	0	0	0	0	0	0	0	1	0	0	0	0	0	0	0	1	0	Foesel, B. U., Rohde, M., & Overmann, J. (2013). Blastocatella fastidiosa gen. nov., sp. nov., isolated from semiarid savanna soil–The first described species of Acidobacteria subdivision 4. Systematic and applied microbiology, 36(2), 82-89.
Acidobacteria	Acidobacteria S6 UU	0	1	0	0	0	1	0	1	0	0	0	0	0	0	0	0	1	0	0	0	0	0	0	0	1	0	Kielak, A. M., Barreto, C. C., Kowalchuk, G. A., van Veen, J. A., & Kuramae, E. E. (2016). The ecology of Acidobacteria: moving beyond genes and genomes. Frontiers in microbiology, 7.
Actinobacteria	Aciditerrimonas	0	0	1	1	0	0	0	0	0	0	0	0	0	0	0	1	0	0	0	0	0	0	0	0	1	0	Itoh, T., Yamanoi, K., Kudo, T., Ohkuma, M., & Takashina, T. (2011). Aciditerrimonas ferrireducens gen. nov., sp. nov., an iron-reducing thermoacidophilic actinobacterium isolated from a solfataric field. International journal of systematic and evolutionary microbiology, 61(6), 1281-1285.
Actinobacteria	Iamia	0	1	0	0	1	0	0	0	0	0	0	0	0	0	1	0	1	0	0	0	1	1	0	0	0	0	Kurahashi, M., Fukunaga, Y., Sakiyama, Y., Harayama, S., & Yokota, A. (2009). Iamia majanohamensis gen. nov., sp. nov., an actinobacterium isolated from sea cucumber Holothuria edulis, and proposal of Iamiaceae fam. nov. International journal of systematic and evolutionary microbiology, 59(4), 869-873. ;Kurahashi et al (2009) Int J Syst Evol Microbiol 59: 869-873
Actinobacteria	Mycobacterium	0	1	0	0	1	0	1	0	0	0	0	0	0	1	0	0	1	0	0	0	1	1	0	0	0	0	Kazda, J., Pavlik, I., Falkinham III, J. O., & Hruska, K. (2010). The ecology of mycobacteria: impact on animal's and human's health. Springer Science & Business Media.
Actinobacteria	Blastococcus	0	0	1	0	1	0	0	1	0	0	1	0	0	1	1	0	1	1	0	0	1	0	0	0	1	0	Sghaier, H., Hezbri, K., Ghodhbane-Gtari, F., Pujic, P., Sen, A., Daffonchio, D., ... & Normand, P. (2016). Stone-dwelling actinobacteria Blastococcus saxobsidens, Modestobacter marinus and Geodermatophilus obscurus proteogenomes. The ISME journal, 10(1), 21-29; Saviola & Bishai (2006) In: The Prokaryotes 3: 919-933; Jones et al (2008) Mol Biol Evol 25(9): 1955-1966;Carlsohn et al (2008) Int J Sy…
Actinobacteria	Geodermatophilus	0	1	1	0	1	0	0	1	0	0	1	0	0	1	1	0	1	1	0	0	0	0	1	0	1	0	Sghaier, H., Hezbri, K., Ghodhbane-Gtari, F., Pujic, P., Sen, A., Daffonchio, D., ... & Normand, P. (2016). Stone-dwelling actinobacteria Blastococcus saxobsidens, Modestobacter marinus and Geodermatophilus obscurus proteogenomes. The ISME journal, 10(1), 21-29.; Normand (2006) In: The Prokaryotes 3: 669-681; Normand (2006) Int J Syst Evol Microbiol 56: 2277-2278
Actinobacteria	Kribbella	0	1	0	0	1	0	0	1	0	0	1	0	0	1	0	0	1	0	0	0	1	0	0	0	0	1	Tóth, E. M., & Borsodi, A. K. (2014). The Family Nocardioidaceae. The Prokaryotes: Actinobacteria, 651-694.;Park et al (1999) Int J Syst Bacteriol 49: 743-752; Trujillo et al (2006) Int J Syst Evol Microbiol 56: 407-411
Actinobacteria	Microlunatus	0	1	0	0	1	0	0	1	0	0	0	0	0	0	1	0	1	0	0	0	1	0	1	0	0	1	Nakamura, K., Hiraishi, A., Yoshimi, Y., Kawaharasaki, M., Masuda, K., & Kamagata, Y. (1995). Microlunatus phosphovorus gen. nov., sp. nov., a new gram-positive polyphosphate-accumulating bacterium isolated from activated sludge. International Journal of Systematic and Evolutionary Microbiology, 45(1), 17-22.;Stackerbrandt & Schaal (2006) In: The Prokaryotes 3: 383-399
Actinobacteria	Crossiella	0	1	0	0	1	0	1	0	0	0	1	0	0	0	1	0	1	0	0	0	1	0	0	0	0	1	Labeda, D. P. (2001). Crossiella gen. nov., a new genus related to Streptoalloteichus. International journal of systematic and evolutionary microbiology, 51(4), 1575-1579.
Actinobacteria	Pseudonocardia	0	1	0	0	1	0	1	0	0	0	1	0	0	0	1	0	1	0	1	0	1	0	0	0	0	1	Huang, Y. and Goodfellow, M. 2015. Pseudonocardia. Bergey's Manual of Systematics of Archaea and Bacteria. 1–32.; Reichert et al (1998) Int J Syst Bacteriol 48: 441-449
Actinobacteria	Streptomyces	0	1	0	0	1	0	1	0	1	0	1	0	0	0	1	0	1	0	1	0	1	1	0	0	0	1	Dworkin (2006) In: The Prokaryotes 2: 140-166; Kämpfer (2006) In: The Prokaryotes 3: 538-604; Krulwich (2006) In: The Prokaryotes 2: 283-308; Martínez-Romero (2006) In: The Prokaryotes 2:793-817; FunGene (http://fungene.cme.msu.edu; Feb 2012); Shapleigh (2006) In: The Prokaryotes 2: 769-792; He et al (2005) Int J Syst Evol Microbiol 55: 1939-1944
Actinobacteria	Actinobacteria MB-A2-108 UUU	0	1	0	0	1	0	1	0	0	0	1	0	0	0	1	0	1	0	0	0	1	0	0	0	0	1	Dworkin (2006) In: The Prokaryotes 2: 140-166; Kämpfer (2006) In: The Prokaryotes 3: 538-604; Krulwich (2006) In: The Prokaryotes 2: 283-308; Martínez-Romero (2006) In: The Prokaryotes 2:793-817; FunGene (http://fungene.cme.msu.edu; Feb 2012); Shapleigh (2006) In: The Prokaryotes 2: 769-792; He et al (2005) Int J Syst Evol Microbiol 55: 1939-1944
Actinobacteria	Euzebya	0	1	0	0	1	0	0	0	0	0	0	0	0	0	1	0	0	0	0	0	1	1	0	0	0	0	Kurahashi, M., Fukunaga, Y., Sakiyama, Y., Harayama, S., & Yokota, A. (2010). Euzebya tangerina gen. nov., sp. nov., a deeply branching marine actinobacterium isolated from the sea cucumber Holothuria edulis, and proposal of Euzebyaceae fam. nov., Euzebyales ord. nov. and Nitriliruptoridae subclassis nov. International journal of systematic and evolutionary microbiology, 60(10), 2314-2319.;The Ed…
Actinobacteria	Rubrobacter	0	1	0	0	1	0	0	0	0	0	0	0	0	1	1	1	1	0	0	0	1	0	0	0	0	0	Suzuki, K. I., Collins, M. D., Iijima, E., & Komagata, K. (1988). Chemotaxonomic characterization of a radiotolerant bacterium, Arthrobacter radiotolerans: Description of Rubrobacter radiotolerans gen. nov., comb. nov. FEMS microbiology letters, 52(1-2), 33-39;Laiz, L., Miller, A. Z., Jurado, V., Akatova, E., Sanchez-Moral, S., Gonzalez, J. M., ... & Saiz-Jimenez, C. (2009). Isolation of five Rub…
Actinobacteria	Actinobacteria TakashiAC-B11 UUU	0	1	0	0	1	0	1	0	0	0	1	0	0	0	1	0	1	0	0	0	0	0	0	0	1	0	Yoshida, H., Yamamoto, K., Murakami, Y., Katsuta, N., Hayashi, T., & Naganuma, T. (2008). The development of Fe-nodules surrounding biological material mediated by microorganisms. Environmental geology, 55(6), 1363-1374.; Kielak, A. M., Barreto, C. C., Kowalchuk, G. A., van Veen, J. A., & Kuramae, E. E. (2016). The ecology of Acidobacteria: moving beyond genes and genomes. Frontiers in microbiolo…
Actinobacteria	Gaiella	0	1	0	0	1	0	0	0	0	0	0	0	0	0	0	0	0	0	0	0	1	0	0	1	0	0	Albuquerque, L., França, L., Rainey, F. A., Schumann, P., Nobre, M. F., & da Costa, M. S. (2011). Gaiella occulta gen. nov., sp. nov., a novel representative of a deep branching phylogenetic lineage within the class Actinobacteria and proposal of Gaiellaceae fam. nov. and Gaiellales ord. nov. Systematic and applied microbiology, 34(8), 595-599.
Actinobacteria	Gaiellales UU	0	1	0	0	1	0	0	0	0	0	0	0	0	0	0	0	0	0	0	0	1	0	0	1	0	0	Albuquerque, L., França, L., Rainey, F. A., Schumann, P., Nobre, M. F., & da Costa, M. S. (2011). Gaiella occulta gen. nov., sp. nov., a novel representative of a deep branching phylogenetic lineage within the class Actinobacteria and proposal of Gaiellaceae fam. nov. and Gaiellales ord. nov. Systematic and applied microbiology, 34(8), 595-599.
Actinobacteria	Thermoleophilum	0	1	0	0	1	0	0	0	0	0	0	0	0	0	0	1	1	0	0	0	0	0	0	0	0	0	Perry (2006) The Prokaryotes 7:843-848
Armatimonadetes	Armatimonadetes UUUU	0	1	0	0		0	0	1	0	0	0	0	0	0	0	0	0	0	0	0	0	0	0	0	0		Lee, K. C., Dunfield, P. F., & Stott, M. B. (2014). The Phylum Armatimonadetes. In The Prokaryotes (pp. 447-458). Springer Berlin Heidelberg.;Tamaki, H., Tanaka, Y., Matsuzawa, H., Muramatsu, M., Meng, X. Y., Hanada, S., ... & Kamagata, Y. (2011). Armatimonas rosea gen. nov., sp. nov., of a novel bacterial phylum, Armatimonadetes phyl. nov., formally called the candidate phylum OP10. Internationa…
	Armatimonadales UU	0	1	0	0		0	0	1	0	0	0	0	0	0	0	0	0	0	0	0	0	0	0	0	0	0	Lee, K. C., Dunfield, P. F., & Stott, M. B. (2014). The Phylum Armatimonadetes. In The Prokaryotes (pp. 447-458). Springer Berlin Heidelberg.;Tamaki, H., Tanaka, Y., Matsuzawa, H., Muramatsu, M., Meng, X. Y., Hanada, S., ... & Kamagata, Y. (2011). Armatimonas rosea gen. nov., sp. nov., of a novel bacterial phylum, Armatimonadetes phyl. nov., formally called the candidate phylum OP10. Internationa…
Bacteroidetes	Ohtaekwangia	0	1	0	0		0	0	1	0	0	0	0	0	0	0	0	1	0		0	0	0	0	0		0	Yoon, J. H., Kang, S. J., Lee, S. Y., Lee, J. S., & Park, S. (2011). Ohtaekwangia koreensis gen. nov., sp. nov. and Ohtaekwangia kribbensis sp. nov., isolated from marine sand, deep-branching members of the phylum Bacteroidetes. International journal of systematic and evolutionary microbiology, 61(5), 1066-1072.
	Rhodocytophaga	0	1	0	0		0	0	0	0	0	0	0	0	0	0	0	1	0	0	0	0	0	0	0	0	0	Anandham, R., Weon, H. Y., Kim, S. J., Kim, Y. S., & Kwon, S. W. (2010). Rhodocytophaga aerolata gen. nov., sp. nov., a new member of the family Cytophagaceae isolated from air. International journal of systematic and evolutionary microbiology, 60(7), 1554-1558.
	Flavisolibacter	0	1	0	0		0	0	0	0	0	0	0	0	0	1	0	1	0	0	0	0	0	0	0	0	0	Yoon et al (2007) Int J Syst Evol Microbiol 57: 1834-1839
	Parafilimonas	0	1	0	0		0	0	0		0	0	0	0	0	0	0	1	0	0	0	0	0	0	0	0	0	Kim, S. J., Park, J. H., Lim, J. M., Ahn, J. H., Anandham, R., Weon, H. Y., & Kwon, S. W. (2014). Parafilimonas terrae gen. nov., sp. nov., isolated from greenhouse soil. International journal of systematic and evolutionary microbiology, 64(9), 3040-3045.
Chloroflexi	Ardenticatenales UU	0	0	1	0	1	0	0	0	0	0	0	0	0	0	0	1	0	0	0	0	1	0	0	0	0	0	Kawaichi, S., Ito, N., Kamikawa, R., Sugawara, T., Yoshida, T., & Sako, Y. (2013). Ardenticatena maritima gen. nov., sp. nov., a ferric iron-and nitrate-reducing bacterium of the phylum ‘Chloroflexi’isolated from an iron-rich coastal hydrothermal field, and description of Ardenticatenia classis nov. International journal of systematic and evolutionary microbiology, 63(8), 2992-3002.
Chloroflexi	Roseiflexus	1	1	0	0	1	0	0		0	0	0	0	0	0	1	1	0	0	0	0	0	0	0	0	0	0	Hanada, S., Takaichi, S., Matsuura, K., & Nakamura, K. (2002). Roseiflexus castenholzii gen. nov., sp. nov., a thermophilic, filamentous, photosynthetic bacterium that lacks chlorosomes. International Journal of Systematic and Evolutionary Microbiology, 52(1), 187-193.;van der Meer, M. T., Klatt, C. G., Wood, J., Bryant, D. A., Bateson, M. M., Lammerts, L., ... & Ward, D. M. (2010). Cultivation a…
Chloroflexi	Kallotenuales AKIW781 U	0	1	0	0	1	0	0	0	0	0	0	0	0	0	0	1	1	0	0	0	0	0	0	0	0	0	Cole, J. K., Gieler, B. A., Heisler, D. L., Palisoc, M. M., Williams, A. J., Dohnalkova, A. C., ... & Hedlund, B. P. (2013). Kallotenue papyrolyticum gen. nov., sp. nov., a cellulolytic and filamentous thermophile that represents a novel lineage (Kallotenuales ord. nov., Kallotenuaceae fam. nov.) within the class Chloroflexia. International journal of systematic and evolutionary microbiology, 63(…
Chloroflexi	Kallotenue	0	1	0	0	1	0	0	0	0	0	0	0	0	0	0	1	1	0	0	0	0	0	0	0	0	0	Cole, J. K., Gieler, B. A., Heisler, D. L., Palisoc, M. M., Williams, A. J., Dohnalkova, A. C., ... & Hedlund, B. P. (2013). Kallotenue papyrolyticum gen. nov., sp. nov., a cellulolytic and filamentous thermophile that represents a novel lineage (Kallotenuales ord. nov., Kallotenuaceae fam. nov.) within the class Chloroflexia. International journal of systematic and evolutionary microbiology, 63(…
Chloroflexi	Chloroflexi JG30-KF-CM66 UUU	1	0	0	0	1	0	0	0	0	0	0	0	0	0	0	0	0	1	0	0	0	0	0	0	0	0	Hanada, S. (2014). The phylum Chloroflexi, the family Chloroflexaceae, and the related phototrophic families Oscillochloridaceae and Roseiflexaceae. In The Prokaryotes (pp. 515-532). Springer Berlin Heidelberg.
Chloroflexi	Chloroflexi KD4-96 UUUU	1	0	0	0	1	0	0	0	0	0	0	0	0	0	0	0	0	1	0	0	0	0	0	0	0	0	Hanada, S. (2014). The phylum Chloroflexi, the family Chloroflexaceae, and the related phototrophic families Oscillochloridaceae and Roseiflexaceae. In The Prokaryotes (pp. 515-532). Springer Berlin Heidelberg.
Chloroflexi	Chloroflexi P2-11E UUU	1	0	0	0	1	0	0	0	0	0	0	0	0	0	0	0	0	1	0	0	0	0	0	0	0	0	Hanada, S. (2014). The phylum Chloroflexi, the family Chloroflexaceae, and the related phototrophic families Oscillochloridaceae and Roseiflexaceae. In The Prokaryotes (pp. 515-532). Springer Berlin Heidelberg.
Chloroflexi	Chloroflexi SAR202_clade UUU	1	0	0	0	1	0	0	0	0	0	0	0	0	0	0	0	0	1	0	0	0	0	0	0	0	0	Hanada, S. (2014). The phylum Chloroflexi, the family Chloroflexaceae, and the related phototrophic families Oscillochloridaceae and Roseiflexaceae. In The Prokaryotes (pp. 515-532). Springer Berlin Heidelberg.
Chloroflexi	Chloroflexi TK10 UUU	1	0	0	0	1	0	0	0	0	0	0	0	0	0	0	0	0	1	0	0	0	0	0	0	0	0	Hanada, S. (2014). The phylum Chloroflexi, the family Chloroflexaceae, and the related phototrophic families Oscillochloridaceae and Roseiflexaceae. In The Prokaryotes (pp. 515-532). Springer Berlin Heidelberg.
Thermomicrobia	Thermomicrobia JG30-KF-CM45 UU	0	1	0	0	1	0	0	0	0	0	0	0	0	0	0	1	0	0	0	0	0	0	0	0	0	0	Garrity, G. M. and Holt, J. G. 2015. Thermomicrobia phy. nov.. Bergey's Manual of Systematics of Archaea and Bacteria. 1.;Garrity, G. M., & Holt, J. G. Thermomicrobia phy. nov. Bergey's Manual of Systematics of Archaea and Bacteria.
Cyanobacteria	Mastigocladopsis	1	0	0	0	1	0	0	0	0	0	0	1	1	1	1	1	0	1	1	0	0	0	0	0	0	0	Dworkin, M. (2006). The prokaryotes: vol. 4: bacteria: firmicutes, cyanobacteria. Springer Science & Business Media.;Caiola, M. G., & Billi, D. (2007). Chroococcidiopsis from desert to Mars. In Algae and cyanobacteria in extreme environments (pp. 553-568). Springer Netherlands.
Cyanobacteria	Chroococcidiopsis	1	0	0	0	0	0	0	0	0	0	0	0	0	1	1	1	0	1	1	0	0	0	0	0	0	0	Whitton, B. A., & Potts, M. (Eds.). (2007). The ecology of cyanobacteria: their diversity in time and space. Springer Science & Business Media.
Cyanobacteria	Microcoleus	1	0	0	0	1	0	0	0	0	0	0	0	1	1	1	0	0	1	1	0	0	0	0	0	0	0	Whitton, B. A., & Potts, M. (Eds.). (2007). The ecology of cyanobacteria: their diversity in time and space. Springer Science & Business Media.
Firmicutes	Bacillus	0	1	0	0	0	0	1	0	1	1	1	0	0	1	1	1	1	0	1	0	1	1	0	0	0	1	Dworkin, M. (2006). The prokaryotes: vol. 4: bacteria: firmicutes, cyanobacteria. Springer Science & Business Media.;Caiola, M. G., & Billi, D. (2007). Chroococcidiopsis from desert to Mars. In Algae and cyanobacteria in extreme environments (pp. 553-568). Springer Netherlands.
Firmicutes	Falsibacillus	0	1	0	1	0	0	0	0	1	0	1	0	0	1	0	1	0	0	0	0	0	0	0	0	0	0	Zhou, Y., Xu, J., Xu, L., & Tindall, B. J. (2009). Falsibacillus pallidus to replace the homonym Bacillus pallidus Zhou et al. 2008. International journal of systematic and evolutionary microbiology, 59(12), 3176-3180.
Firmicutes	Salinibacillus	0	1	0	1	0	0	0	0	0	0	0	0	0	0	1	0	0	0	0	0	0	0	0	0	0	0	Ren, P. G., & Zhou, P. J. (2005). Salinibacillus aidingensis gen. nov., sp. nov. and Salinibacillus kushneri sp. nov., moderately halophilic bacteria isolated from a neutral saline lake in Xin-Jiang, China. International journal of systematic and evolutionary microbiology, 55(2), 949-953.
Gematimonadetes	Gemmatimonadaceae U	0	1	0	1	0	0	0	1	0	0	0	0	0	1	1	0	0	0	0	0	0	0	1	0	0	0	Hanada, S., & Sekiguchi, Y. (2014). The phylum gemmatimonadetes. The Prokaryotes: Other Major Lineages of Bacteria and The Archaea, 677-681.
Gematimonadetes	Gemmatimonas	0	1	0	1	0	0	0	1	0	0	0	0	0	1	1	0	0	0	0	0	0	0	1	0	0	0	Hanada, S., & Sekiguchi, Y. (2014). The phylum gemmatimonadetes. The Prokaryotes: Other Major Lineages of Bacteria and The Archaea, 677-681.
Nitrospirae	Nitrospira	0	0	1	0	0	0	0	0	0	0	0	0	0	0	1	0	0	1	0	1	0	0	0	0	0	0	Lücker, S., Wagner, M., Maixner, F., Pelletier, E., Koch, H., Vacherie, B., ... & Daims, H. (2010). A Nitrospira metagenome illuminates the physiology and evolution of globally important nitrite-oxidizing bacteria. Proceedings of the National Academy of Sciences, 107(30), 13479-13484.
Plactomycetales	Gemmata	0	1	0	0	0	0	0	0	0	0	0	0	0	0	1	0	0	0	0	0	0	0	0	0	0	0	Ward, N., Staley, J. T., Fuerst, J. A., Giovannoni, S., Schlesner, H., & Stackebrandt, E. (2006). The order planctomycetales, including the genera planctomyces, pirellula, gemmata and Isosphaera and the candidatus genera brocadia, kuenenia and scalindua. In The prokaryotes (pp. 757-793). Springer New York.
AlfaPoteobacteria	Bosea	0	1	0	0	0	0	0	0	0	0	0	0	0	0	0	0	0	0	1	0	0	1	0	0	0	0	Jones et al (2008) Mol Biol Evol 25(9): 1955-1966; Das et al (1996) Int J Syst Bacteriol 46(4): 981-987
AlfaPoteobacteria	Bradyrhizobium	0	0	1	0	0	0	0	0	0	0	0	0	0	0	0	0	0	1	1	0	1	0	1	0	0	0	Alves, L. M. C., de Souza, J. A. M., de Mello Varani, A., & de Macedo Lemos, E. G. (2014). The family rhizobiaceae. In The Prokaryotes (pp. 419-437). Springer Berlin Heidelberg.
AlfaPoteobacteria	Rhizobiales FFCH5858 U	0	0	1	0	0	0	0	0	0	0	0	0	0	0	0	0	0	1	1	0	1	0	1	0	0	0	Alves, L. M. C., de Souza, J. A. M., de Mello Varani, A., & de Macedo Lemos, E. G. (2014). The family rhizobiaceae. In The Prokaryotes (pp. 419-437). Springer Berlin Heidelberg.
AlfaPoteobacteria	Rhizobiales JG34-KF-361 U	0	0	1	0	0	0	0	0	0	0	0	0	0	0	0	0	0	1	1	0	1	0	1	0	0	0	Alves, L. M. C., de Souza, J. A. M., de Mello Varani, A., & de Macedo Lemos, E. G. (2014). The family rhizobiaceae. In The Prokaryotes (pp. 419-437). Springer Berlin Heidelberg.
AlfaPoteobacteria	Microvirga	0	1	0	0	0	0	0	0	0	0	0	0	0	0	0	0	0	0	0	0	1	0	1	0	0	0	Kanso, S., & Patel, B. K. (2003). Microvirga subterranea gen. nov., sp. nov., a moderate thermophile from a deep subsurface Australian thermal aquifer. International journal of systematic and evolutionary microbiology, 53(2), 401-406.
AlfaPoteobacteria	Rhizobiales P-102 U	0	0	1	0	0	0	0	0	0	0	0	0	0	0	0	0	0	1	1	0	1	0	1	0	0	0	Alves, L. M. C., de Souza, J. A. M., de Mello Varani, A., & de Macedo Lemos, E. G. (2014). The family rhizobiaceae. In The Prokaryotes (pp. 419-437). Springer Berlin Heidelberg.
AlfaPoteobacteria	Rhizobium	0	0	1	0	0	0	0	0	0	0	0	0	0	0	1	0	0	1	1	0	1	0	1	0	0	0	Alves, L. M. C., de Souza, J. A. M., de Mello Varani, A., & de Macedo Lemos, E. G. (2014). The family rhizobiaceae. In The Prokaryotes (pp. 419-437). Springer Berlin Heidelberg.
AlfaPoteobacteria	Craurococcus	0	1	0	0	0	0	0	0	0	0	0	0	0	0	0	0	0	1	0	0	1	0	1	0	0	0	Yurkov & Csotonyi (2008) In: The purple phototrophic bacteria; Saitoh, S., Suzuki, T., & Nishimura, Y. (1998). Proposal of Craurococcus roseus gen. nov., sp. nov. and Paracraurococcus ruber gen. nov., sp. nov., novel aerobic bacteriochlorophyll a-containing bacteria from soil. International Journal of Systematic and Evolutionary Microbiology, 48(3), 1043-1047.
	Rhodospirillales DA111 U	1	0	0	1	0	0	0	0	0	0	0	0	0	0	0	0	0	1	0	0	0	0	0	0	0	0	Imhoff, J. F., Hiraishi, A., & Süling, J. (2005). Anoxygenic phototrophic purple bacteria. In Bergey’s Manual® of Systematic Bacteriology (pp. 119-132). Springer US.
	Candidatus_Alysiosphaera	0	1	0	0	1	0	0	0	0	0	0	0	0	0	0	0	0	0	0	1	1	1	1	0	0	0	Kragelund, C., Kong, Y., Van der Waarde, J., Thelen, K., Eikelboom, D., Tandoi, V., ... & Nielsen, P. H. (2006). Ecophysiology of different filamentous Alphaproteobacteria in industrial wastewater treatment plants. Microbiology, 152(10), 3003-3012.
	Sphingomonadales AKYG937 U	0	1	0	0	0	1	0	0	0	0	0	0	0	0	1	0	1	0	1	0	1	0	0	0	0	0	Takeuchi et al (2001) Int J Syst Evol Microbiol 51: 1405-1417; FunGene (http://fungene.cme.msu.edu; Feb 2012); Lee et al (2001) Int J Syst Evol Microbiol 51: 1491-1498; Yoon et al (2008) Int J Syst Evol Microbiol 58: 231-236
	Sphingomonadales JG34-KF-161 U	0	1	0	0	0	1	0	0	0	0	0	0	0	0	1	0	1	0	1	0	1	0	0	0	0	0	Takeuchi et al (2001) Int J Syst Evol Microbiol 51: 1405-1417; FunGene (http://fungene.cme.msu.edu; Feb 2012); Lee et al (2001) Int J Syst Evol Microbiol 51: 1491-1498; Yoon et al (2008) Int J Syst Evol Microbiol 58: 231-236
	Sphingomonas	0	1	0	0	0	1	0	0	0	0	0	0	0	0	1	0	1	0	1	0	1	0	0	0	0	0	Takeuchi et al (2001) Int J Syst Evol Microbiol 51: 1405-1417; FunGene (http://fungene.cme.msu.edu; Feb 2012); Lee et al (2001) Int J Syst Evol Microbiol 51: 1491-1498; Yoon et al (2008) Int J Syst Evol Microbiol 58: 231-236
	Candidatus_Entotheonella	0	1	0	0	1	0	0	0	0	0	0	0	0	0	0	0	0	0	0	0	0	0	0	0	0	1	Wilson, M. C., Mori, T., Rückert, C., Uria, A. R., Helf, M. J., Takada, K., ... & Rinke, C. (2014). An environmental bacterial taxon with a large and distinct metabolic repertoire. Nature, 506(7486), 58.
	Nitrosococcus	0	0	1	0	0	0	0	0	0	0	0	0	0	0	1	0	0	1	0	1	0	0	0	0	0	0	Koops, H.-P. and Pommerening-Röser, A. 2015. Nitrosococcus. Bergey's Manual of Systematics of Archaea and Bacteria. 1–3.
	Dyella	0	1	0	1	0	0	0	0	0	0	0	0	0	0	0	0	0	0	0	0	1	0	0	0	0	0	Xie, C. H., & Yokota, A. (2005). Dyella japonica gen. nov., sp. nov., a γ-proteobacterium isolated from soil. International journal of systematic and evolutionary microbiology, 55(2), 753-756.
	Fulvimonas	0	1	0	1	0	0	0	0	0	0	0	0	0	0	1	0	1	0	0	0	0	0	0	0	0	0	Ahn, J. H., Kim, S. J., Weon, H. Y., Hong, S. B., Seok, S. J., & Kwon, S. W. (2014). Fulvimonas yonginensis sp. nov., isolated from greenhouse soil, and emended description of the genus Fulvimonas. International journal of systematic and evolutionary microbiology, 64(8), 2758-2762. Mergaert, J., Cnockaert, M. C., & Swings, J. (2002). Fulvimonas soli gen. nov., sp. nov., a gamma-proteobacterium is…
	Steroidobacter	0	1	0	1	0	0	0	0	0	0	0	0	0	0	0	0	0	0	0	0	1	1	0	0	0	0	Fahrbach, M., Kuever, J., Remesch, M., Huber, B. E., Kämpfer, P., Dott, W., & Hollender, J. (2008). Steroidobacter denitrificans gen. nov., sp. nov., a steroidal hormone-degrading gammaproteobacterium. International Journal of Systematic and Evolutionary Microbiology, 58(9), 2215-2223.
	Saccharibacteria UUUU	0	1	0	0	0	0	0	0	0	0	0	0	0	0	0	0	1	0	0	0	1	0	0	0	0	0	Kindaichi, T., Yamaoka, S., Uehara, R., Ozaki, N., Ohashi, A., Albertsen, M., ... & Nielsen, J. L. (2016). Phylogenetic diversity and ecophysiology of Candidate phylum Saccharibacteria in activated sludge. FEMS microbiology ecology, 92(6).
